# Supplementary material for: Prenatal electroporation-mediated gene transfer restores Slc26a4 knock-out mouse hearing and vestibular function
Source: PubMed Central journal article supplement (PMC6884448; doi:10.1038/s41598-019-54262-3), 2019-11-29
Supplement: 41598_2019_54262_MOESM1_ESM.pdf [file 41598_2019_54262_MOESM1_ESM.pdf]

# **Prenatal electroporation-mediated gene transfer restores Slc26a4 knock-out mouse hearing and vestibular function**

Supplemental figures, tables and legends

Hiroki Takeda<sup>1,2</sup>, Toru Miwa<sup>1,3</sup>, Min young Kim<sup>4</sup>, Byung Yoon Choi<sup>4</sup>, Yori-hisa Orita<sup>1</sup> and Ryosei Minoda\*<sup>3</sup>

<sup>1</sup>: Departments of Otolaryngology-Head and Neck Surgery Kumamoto University, Graduate School of Medicine, 1-1-1 Honjo, Chuoku, Kumamoto city, Japan

<sup>2</sup>: Department of Otolaryngology, University of Colorado Denver, Anschutz Medical Campus, Aurora, Colorado, USA

<sup>3</sup>: Departments of Otolaryngology-Head and Neck Surgery, Middle Ear and Inner Ear Surgical Center, JCHO Kumamoto General Hospital, 10-10 Tori Machi, Yatsushiro, Kumamoto, 866-8660, Japan

<sup>4</sup>: Department of Otorhinolaryngology, Seoul National University Bundang Hospital, Seongnam, South Korea

**A** Electroporation utilizing a Monophasic Pulse

| Voltage (V) | Pulse Width (ms) | Pulse Interval (ms) | Frequency |
|-------------|------------------|---------------------|-----------|
| 30 or 40    | 50               | 950                 | 5         |

**B** Electroporation utilizing Biphasic Pulses

| Poring Pulses (Pp) |                  |                     |           |                 |          | Transfer Pulses (Tp) |                  |                     |           |                 |          |
|--------------------|------------------|---------------------|-----------|-----------------|----------|----------------------|------------------|---------------------|-----------|-----------------|----------|
| Voltage (V)        | Pulse Width (ms) | Pulse Duration (ms) | Frequency | Attenuation (%) | Polarity | Voltage (V)          | Pulse Width (ms) | Pulse Duration (ms) | Frequency | Attenuation (%) | Polarity |
| 10 to 40           | 10               | 950                 | 2         | 40              | +/-      | 5 to 25              | 50               | 950                 | 2         | 40%             | +/-      |

**Supplemental Table 1**

Pulse conditions in the M-treated group (**A**) and in the B-treated group (**B**).

**A** Control

| Voltage (V) | Survival Rates of Treated Dams | Survival Rates of Treated Embryos | EGFP Expression Rates in Survived Embryos | EGFP Expression Rates in Treated Embryos |
|-------------|--------------------------------|-----------------------------------|-------------------------------------------|------------------------------------------|
| 0           | 83.3%(5/6)                     | 83.3% (5/6)                       | 0.0% (0/0)                                | 0.0% (0/0)                               |

**B** Electroporation utilizing a Monophasic Pulse

| Voltage (V) | Survival Rates of Treated Dams | Survival rates of treated embryos | EGFP expression rates in survived embryos | EGFP expression rates in treated embryos |
|-------------|--------------------------------|-----------------------------------|-------------------------------------------|------------------------------------------|
| 40 x5       | 100% (4/4)                     | 12.5% (1/8)                       | 100.0% (1/1)                              | 12.5% (1/8)                              |
| 30 x5       | 100% (3/3)                     | 66.7% (4/6)                       | 75.0% (3/4)                               | 50.0% (3/6)                              |
| Total       | 100% (7/7)                     | 35.7% (5/14)                      | 80.0% (4/5)                               | 21.4% (3/14)                             |

**C** Electroporation utilizing Biphasic Pulses

| Pp Voltage (V) | Tp Voltage (V) | Survival Rates of Treated Dams | Survival Rates of Treated Embryos | EGFP expression rates in survived embryos | EGFP expression rates in treated embryos |
|----------------|----------------|--------------------------------|-----------------------------------|-------------------------------------------|------------------------------------------|
| 40 x2          | 25 x2          | 62.5% (5/8)                    | 10.0% (1/10)                      | 0.0% (0/1)                                | 0.0% (0/10)                              |
| 30 x2          | 20 x2          | 100% (3/3)                     | 50.0% (3/6)                       | 33.0% (1/3)                               | 16.7% (1/6)                              |
| <b>25 x2</b>   | <b>15 x2</b>   | 100% (5/5)                     | <b>77.8% (7/9)</b>                | <b>71.4% (5/7)</b>                        | <b>55.6% (5/9)</b>                       |
| 20 x2          | 20 x2          | 100% (3/3)                     | 50.0% (2/4)                       | 50.0% (1/2)                               | 25.0% (1/4)                              |
| 20 x2          | 15 x2          | 100% (5/5)                     | 77.8% (7/9)                       | 42.9%(3/7)                                | 33.3% (3/9)                              |
| 20 x2          | 10 x2          | 100% (3/3)                     | 66.7% (4/6)                       | 50.0% (2/4)                               | 33.3% (2/6)                              |
| 15 x2          | 10 x2          | 100% (4/4)                     | 62.5% (5/8)                       | 25.0% (1/4)                               | 12.5% (1/8)                              |
| 10 x2          | 5 x2           | 100% (3/3)                     | 75.0% (3/4)                       | 0.0% (0/3)                                | 0.0% (0/4)                               |
| Total          |                | 91.2% (31/34)                  | 53.6% (30/56)                     | 46.7% (14/30)                             | 25.0%(14/56)                             |

**Supplemental Table 2.**

The survival rates and EGFP expression rates after treatment in the control group (**A**), in the M-treated group (**B**), and in the B-treated group (**C**).

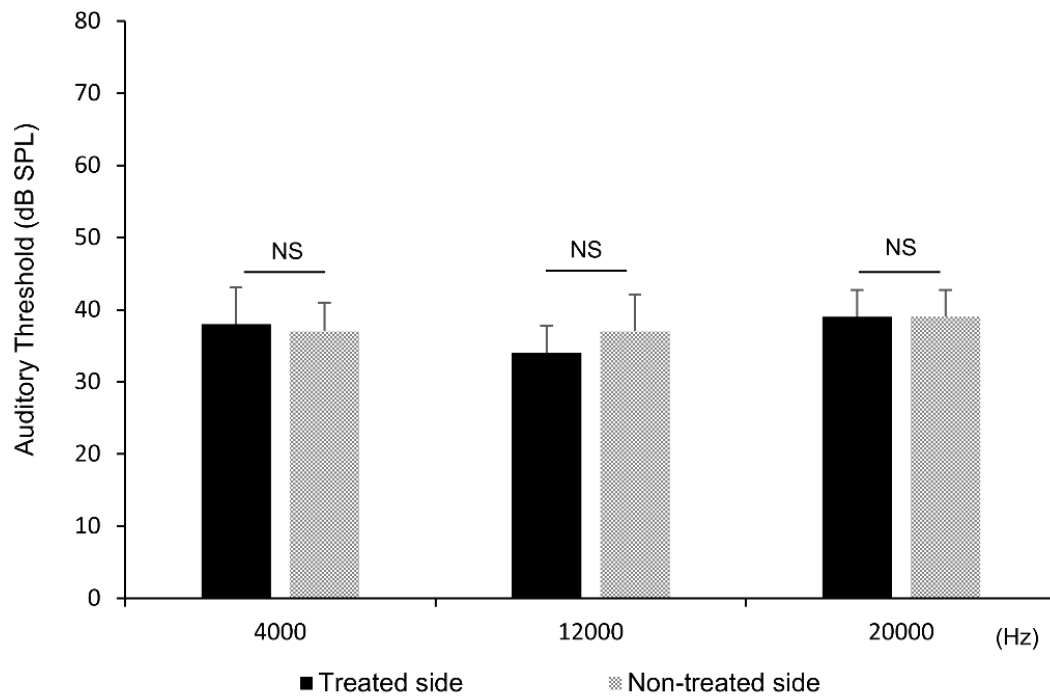

**Supplemental Figure 1.**

ABR testing results of WT mice at P 30 after *Egfp* gene transfection in the B-treated group. No significant difference is found between the treated and the non-treated sides at 4, 12 and 20 kHz.

*n*=5.

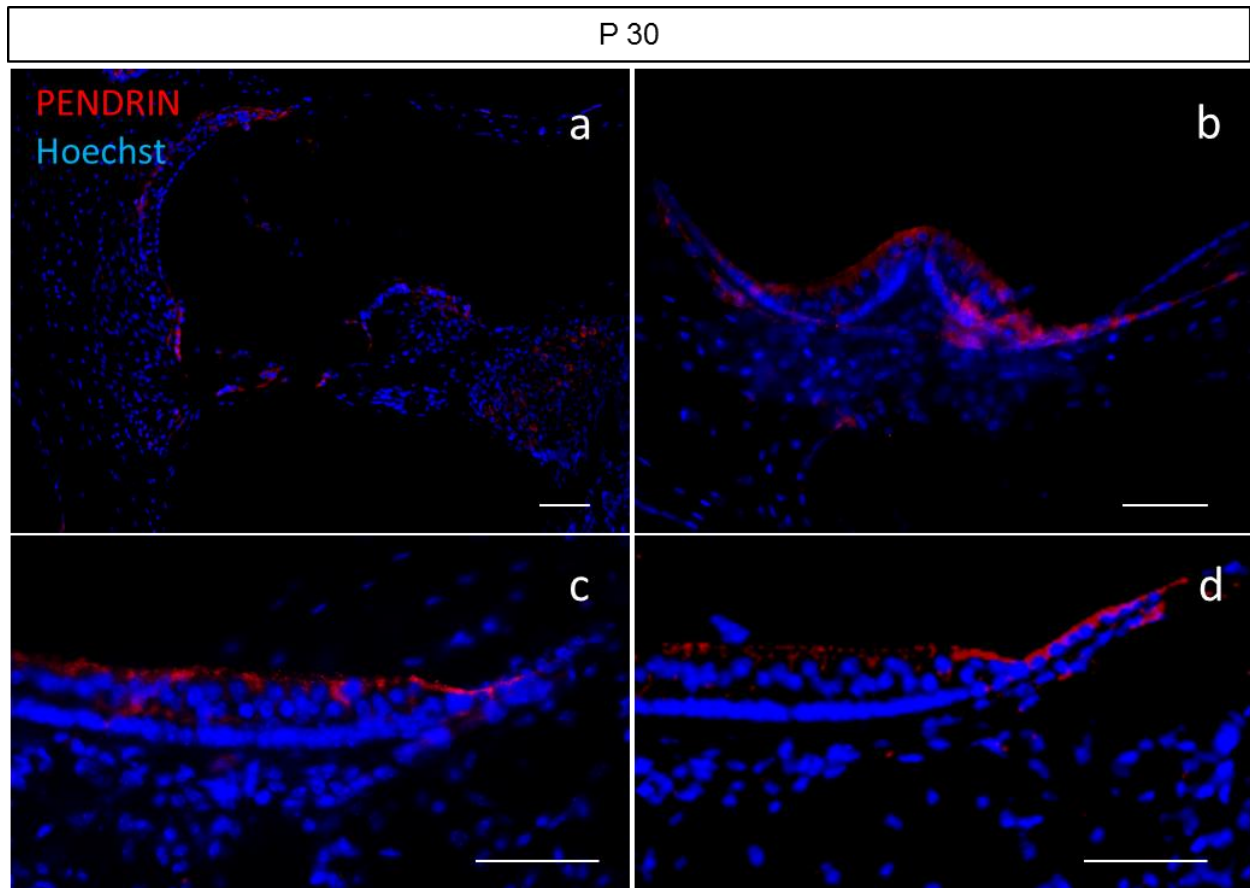

**Supplemental Figure 2.**

Immunohistochemistry of the wild type mouse inner ear at P 30 using anti-PENDING antibody. PENDING expressions are found in the cochlea (a), ampulla (b), saccule (b) and utricle (c). Red indicates PENDING expression and blue indicates nuclear (Hoechst) staining. Bars represent 50  $\mu\text{m}$  each.

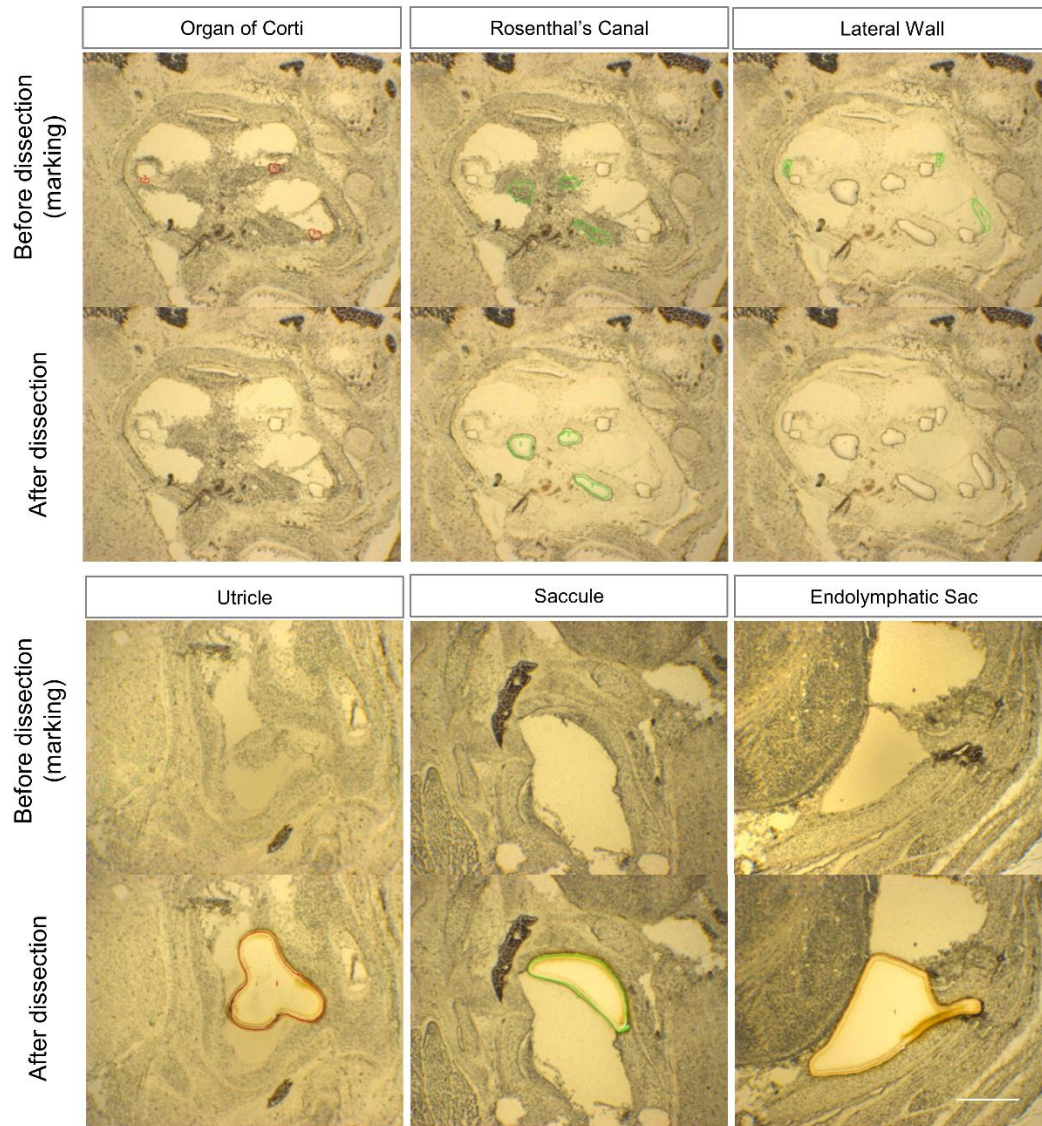

**Supplemental Figure 3.**

Nomarski images for LMD. The areas surrounded by yellow-green or orange colored lines show respective areas. Bar indicates 100  $\mu\text{m}$ .

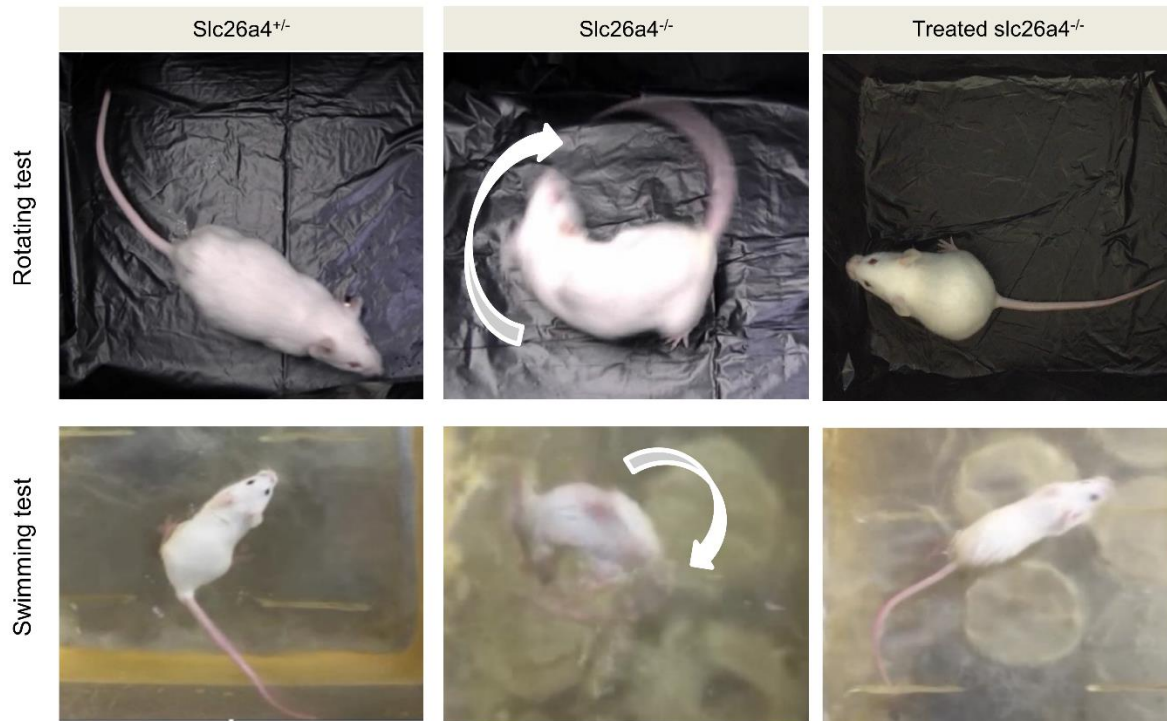

**Supplemental Figure 4.**

Images of the *Slc26a4*<sup>+/-</sup>, non-treated *Slc26a4*<sup>-/-</sup> and treated *Slc26a4*<sup>-/-</sup> mice in the box or water at P 30. Non-treated *Slc26a4*<sup>-/-</sup> mice display severe circling behavior and swimming disability, while *Slc26a4*<sup>+/-</sup> and treated *Slc26a4*<sup>-/-</sup> mice behave and swim almost normally.

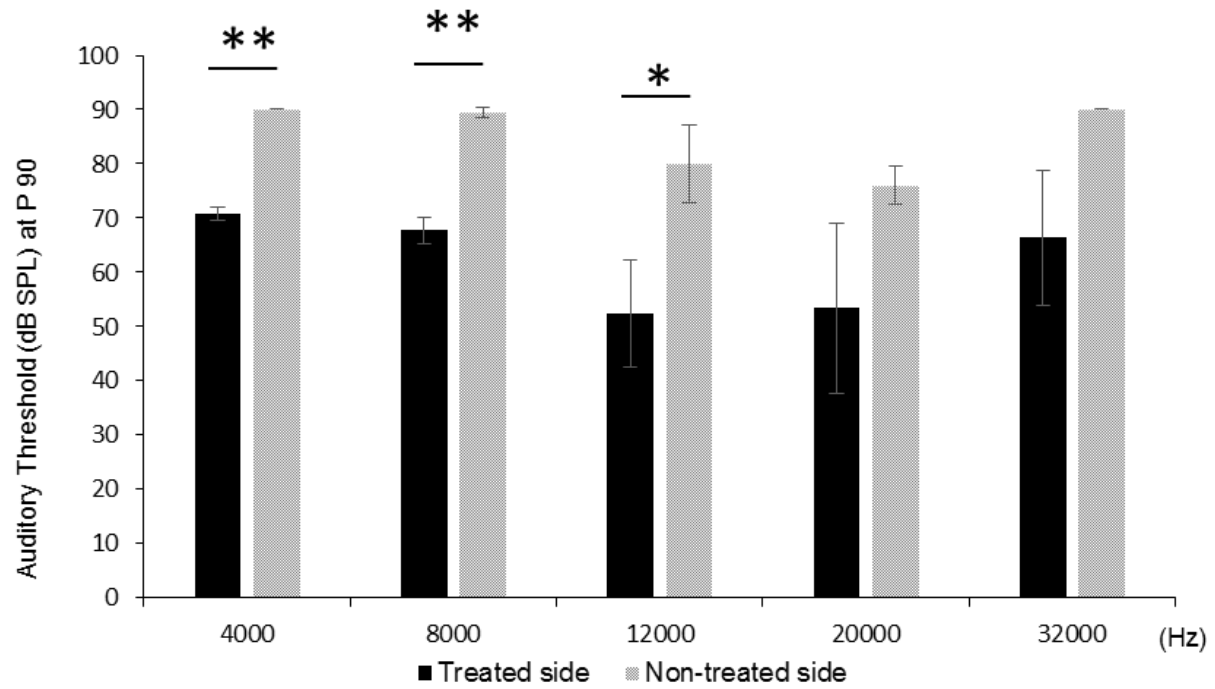

**Supplemental Figure 5.**

ABR testing results of *Slc26a4*<sup>-/-</sup> mice at P 90 after treatment. Statistically significant difference is found between the treated and the untreated sides in *Slc26a4*<sup>-/-</sup> mice at 4, 8 and 12 kHz. Each  $n=3$ . \*:  $P < 0.05$  (Student-t test)
